# Supplementary material for: Chronic lesion activity and disability progression in secondary progressive multiple sclerosis
Source: PubMed Central journal article supplement — BMJ Neurol Open. 2022 Jun 7;4(1):e000240. doi: 10.1136/bmjno-2021-000240 (PMC9185385; doi:10.1136/bmjno-2021-000240), 2022-06-07
Supplement: bmjno-2021-000240supp001.pdf [file bmjno-2021-000240supp001.pdf]

**Supplemental Table S1: SEL Count**

| <b>Baseline Age, Years</b> | <b>&lt;=45</b>  | <b>&gt;45-52</b> | <b>&gt;52</b>   |
|----------------------------|-----------------|------------------|-----------------|
| n                          | 210             | 206              | 184             |
| Mean                       | 7.5429          | 8.0825           | 7.5435          |
| Standard deviation         | 8.83991         | 11.39396         | 10.69489        |
| Median                     | 4.0000          | 4.0000           | 3.5000          |
| 25%, 75% percentile        | 1.0000, 12.0000 | 1.0000, 10.0000  | 1.0000, 11.0000 |
| Min, Max                   | 0.000, 42.000   | 0.000, 78.000    | 0.000, 61.000   |

| <b>Years since First MS symptoms</b> | <b>&lt;=8</b>  | <b>&gt;8-15</b> | <b>&gt;15</b>  |
|--------------------------------------|----------------|-----------------|----------------|
| n                                    | 206            | 213             | 177            |
| Mean                                 | 7.0437         | 8.0282          | 8.113          |
| Standard deviation                   | 9.28324        | 10.38364        | 11.37675       |
| Median                               | 3.0000         | 4.0000          | 4.0000         |
| 25%, 75% percentile                  | 1.0000, 9.0000 | 1.0000, 12.0000 | 1.0000, 9.0000 |
| Min, Max                             | 0.000, 42.000  | 0.000, 61.000   | 0.000, 78.000  |

| <b>Baseline EDSS</b> | <b>High EDSS≥6.0</b> | <b>Low EDSS&lt;6.0</b> |
|----------------------|----------------------|------------------------|
| n                    | 361                  | 239                    |
| Mean                 | 8.5014               | 6.5607                 |
| Standard deviation   | 11.05972             | 9.01466                |
| Median               | 4.0000               | 3.0000                 |
| 25%, 75% percentile  | 1.0000, 12.0000      | 1.0000, 8.0000         |
| Min, Max             | 0.000, 61.000        | 0.000, 78.000          |

| <b>Gender</b>       | <b>Female</b>   | <b>Male</b>    |
|---------------------|-----------------|----------------|
| n                   | 381             | 219            |
| Mean                | 8.2572          | 6.8082         |
| Standard deviation  | 10.65324        | 9.69677        |
| Median              | 4.0000          | 3.0000         |
| 25%, 75% percentile | 1.0000, 11.0000 | 1.0000, 8.0000 |
| Min, Max            | 0.000, 78.000   | 0.000, 59.000  |

**Supplemental Table S2: SEL Volume, T1-weighted**

| <b>Baseline Age, Years</b>           | <b>&lt;=45</b> | <b>&gt;45-52</b> | <b>&gt;52</b> |
|--------------------------------------|----------------|------------------|---------------|
| n                                    | 210            | 206              | 184           |
| Mean, mm <sup>3</sup>                | 688.81         | 748.97           | 799.79        |
| Standard deviation, mm <sup>3</sup>  | 1472.156       | 1552.809         | 2127.059      |
| Median, mm <sup>3</sup>              | 117.16         | 200.29           | 111.44        |
| 25%, 75% percentile, mm <sup>3</sup> | 5.72, 738.20   | 5.72, 586.55     | 2.86, 708.16  |
| Min, Max, mm <sup>3</sup>            | 0.0, 14131.7   | 0.0, 10809.8     | 0.0, 23708.3  |

| <b>Years since First MS symptoms</b> | <b>&lt;=8</b> | <b>&gt;8-15</b> | <b>&gt;15</b> |
|--------------------------------------|---------------|-----------------|---------------|
| n                                    | 206           | 213             | 177           |
| Mean, mm <sup>3</sup>                | 750.11        | 680.26          | 812.86        |
| Standard deviation, mm <sup>3</sup>  | 1748.405      | 1178.017        | 2198.383      |
| Median, mm <sup>3</sup>              | 101.00        | 145.92          | 145.92        |
| 25%, 75% percentile, mm <sup>3</sup> | 0.00, 595.14  | 5.72, 726.76    | 31.47, 515.02 |
| Min, Max, mm <sup>3</sup>            | 0.0, 14131.7  | 0.0, 8123.1     | 0.0, 23708.3  |

| <b>Baseline EDSS</b>                 | <b>High EDSS≥6.0</b> | <b>Low EDSS&lt;6.0</b> |
|--------------------------------------|----------------------|------------------------|
| n                                    | 361                  | 239                    |
| Mean, mm <sup>3</sup>                | 848.52               | 584.86                 |
| Standard deviation, mm <sup>3</sup>  | 1944.682             | 1304.472               |
| Median, mm <sup>3</sup>              | 151.65               | 105.87                 |
| 25%, 75% percentile, mm <sup>3</sup> | 8.58, 738.20         | 2.86, 517.88           |
| Min, Max, mm <sup>3</sup>            | 0.0, 23708.3         | 0.0, 14131.7           |

| <b>Gender</b>                        | <b>Female</b> | <b>Male</b>  |
|--------------------------------------|---------------|--------------|
| n                                    | 381           | 219          |
| Mean, mm <sup>3</sup>                | 791.37        | 660.22       |
| Standard deviation, mm <sup>3</sup>  | 1631.066      | 1870.948     |
| Median, mm <sup>3</sup>              | 151.65        | 103.00       |
| 25%, 75% percentile, mm <sup>3</sup> | 14.31, 663.81 | 0.00, 595.14 |
| Min, Max, mm <sup>3</sup>            | 0.0, 14131.7  | 0.0, 23708.3 |

**Supplemental Table S3: non-SEL Volume, T1-weighted**

| <b>Baseline Age, Years</b>           | <b>&lt;=45</b>   | <b>&gt;45-52</b> | <b>&gt;52</b>   |
|--------------------------------------|------------------|------------------|-----------------|
| n                                    | 210              | 206              | 184             |
| Mean, mm <sup>3</sup>                | 4703.94          | 4785.52          | 4949.89         |
| Standard deviation, mm <sup>3</sup>  | 5107.976         | 5174.203         | 6318.338        |
| Median, mm <sup>3</sup>              | 2658.10          | 3107.31          | 2778.27         |
| 25%, 75% percentile, mm <sup>3</sup> | 1084.41, 7027.21 | 1178.83, 6878.43 | 816.89, 5945.66 |
| Min, Max, mm <sup>3</sup>            | 34.3, 27333.5    | 8.6, 31751.2     | 0.0, 45313.5    |

| <b>Years since First MS symptoms</b> | <b>&lt;=8</b>   | <b>&gt;8-15</b>  | <b>&gt;15</b>    |
|--------------------------------------|-----------------|------------------|------------------|
| n                                    | 206             | 213              | 177              |
| Mean, mm <sup>3</sup>                | 4184.01         | 4811.28          | 5563.19          |
| Standard deviation, mm <sup>3</sup>  | 5141.369        | 5246.273         | 6203.788         |
| Median, mm <sup>3</sup>              | 2123.04         | 2969.97          | 3525.05          |
| 25%, 75% percentile, mm <sup>3</sup> | 603.72, 5808.32 | 1010.02, 6712.48 | 1599.43, 7264.70 |
| Min, Max, mm <sup>3</sup>            | 8.6, 27851.3    | 0.0, 31751.2     | 68.7, 45313.5    |

| <b>Baseline EDSS</b>                 | <b>High EDSS≥6.0</b> | <b>Low EDSS&lt;6.0</b> |
|--------------------------------------|----------------------|------------------------|
| n                                    | 361                  | 239                    |
| Mean, mm <sup>3</sup>                | 4938.26              | 4609.67                |
| Standard deviation, mm <sup>3</sup>  | 5491.272             | 5569.331               |
| Median, mm <sup>3</sup>              | 3061.53              | 2509.31                |
| 25%, 75% percentile, mm <sup>3</sup> | 1078.69, 6878.43     | 875.54, 6434.93        |
| Min, Max, mm <sup>3</sup>            | 0.0, 45313.5         | 8.6, 30189.0           |

| <b>Gender</b>                        | <b>Female</b>   | <b>Male</b>      |
|--------------------------------------|-----------------|------------------|
| n                                    | 381             | 219              |
| Mean, mm <sup>3</sup>                | 5049.94         | 4385.38          |
| Standard deviation, mm <sup>3</sup>  | 5860.391        | 4856.158         |
| Median, mm <sup>3</sup>              | 3061.53         | 2615.18          |
| 25%, 75% percentile, mm <sup>3</sup> | 841.21, 7138.80 | 1101.58, 5851.24 |
| Min, Max, mm <sup>3</sup>            | 22.9, 45313.5   | 0.0, 27851.3     |
